## Erratum

### Original Articles Corrected According to 2014 Errata

The errors outlined in the previously published errata<sup>1-5</sup> from 2014 have been made in the currently available online versions of the corresponding articles.<sup>6-10</sup>

#### References

1. Nitrous oxide-related postoperative nausea and vomiting depends on duration of exposure: Erratum. *ANESTHESIOLOGY* 2014; 121:1359
2. In reply (Comment on: Academic anesthesia: Innovate to avoid extinction): Erratum. *ANESTHESIOLOGY* 2014; 121:1362
3. Comparison of the potency of different propofol formulations: A randomized, double-blind trial using closed-loop administration: Erratum. *ANESTHESIOLOGY* 2014; 121:672
4. A phase I, dose-escalation trial evaluating the safety and efficacy of emulsified isoflurane in healthy human volunteers: Erratum. *ANESTHESIOLOGY* 2014; 120:1527
5. Neuraxial anesthesia in parturients with intracranial pathology: A comprehensive review and reassessment of risk: Erratum. *ANESTHESIOLOGY* 2014; 120:1061
6. Peyton PJ, Wu CY: Nitrous oxide-related postoperative nausea and vomiting depends on duration of exposure. *ANESTHESIOLOGY* 2014; 120:1137-45
7. Todd MM, Fleisher L: In reply. *ANESTHESIOLOGY* 2014; 121:428-9
8. Le Guen M, Grassin-Delye S, Cornet C, Genty A, Chazot T, Dardelle D, Liu N, Dreyfus J-F, Mazoit J-X, Devillier P, Alvarez J-C, Sessler DI, Fischler M: Comparison of the potency of different propofol formulations: A randomized, double-blind trial using closed-loop administration. *ANESTHESIOLOGY* 2014; 121:355-64
9. Huang H, Li R, Liu J, Zhang W, Liao T, Yi X: A phase I, dose-escalation trial evaluating the safety and efficacy of emulsified isoflurane in healthy human volunteers. *ANESTHESIOLOGY* 2014; 120:614-25
10. Leffert LR, Schwamm LH: Neuraxial anesthesia in parturients with intracranial pathology: A comprehensive review and reassessment of risk. *ANESTHESIOLOGY* 2013; 119: 703-18

## Erratum

### Original Articles Corrected According to 2015 Errata

The errors outlined in the previously published errata<sup>1-3</sup> from 2015 have been made in the currently available online versions of the corresponding articles.<sup>4-6</sup>

#### References

1. Application of the continual reassessment method to dose-finding studies in regional anesthesia: An estimate of the ED95 dose for 0.5% bupivacaine for ultrasound-guided supraclavicular block: Erratum. *ANESTHESIOLOGY* 2015; 123:740
2. Future of anesthesiology is perioperative medicine: A call for action: Erratum. *ANESTHESIOLOGY* 2015; 123:492
3. A comparison of propofol- and dexmedetomidine-induced electroencephalogram dynamics using spectral and coherence analysis: Erratum. *ANESTHESIOLOGY* 2015; 122:958
4. Kant A, Gupta PK, Zohar S, Chevret S, Hopkins PM: Application of the continual reassessment method to dose-finding studies in regional anesthesia: An estimate of the ED95 dose for 0.5% bupivacaine for ultrasound-guided supraclavicular block. *ANESTHESIOLOGY* 2013; 119:29-35
5. Kain ZN, Fitch JCK, Kirsch JR, Mets B, Pearl RG: Future of anesthesiology is perioperative medicine: A call for action. *ANESTHESIOLOGY* 2015; 122:1192-5
6. Akeju O, Pavone KJ, Westover MB, Vazquez R, Prerau MJ, Harrell PG, Hartnack KE, Rhee J, Sampson AL, Habeeb K, Lei G, Pierce ET, Walsh JL, Brown EN, Purdon PL: A comparison of propofol- and dexmedetomidine-induced electroencephalogram dynamics using spectral and coherence analysis. *ANESTHESIOLOGY* 2014; 121:978-89
